# Supplementary material
Source: publisher site journal article supplement (https://www.spandidos-publications.com/3155/downloadSupplementary)

Figure S1. HCG11 induces chemotherapeutic resistance of colorectal cancer cells to cisplatin. (A) Cell cycle distribution analysis revealed that HCG11-overexpression decreased the percentage of cells in the G<sub>1</sub> phase and increased that in the S phase. (B) Overexpression of HCG11 enhanced the (B) proliferative, (C) colony formation and (D) migration abilities of colorectal carcinoma cell lines. HCG11, HLA complex group 11; oe, overexpression; NC, negative control.

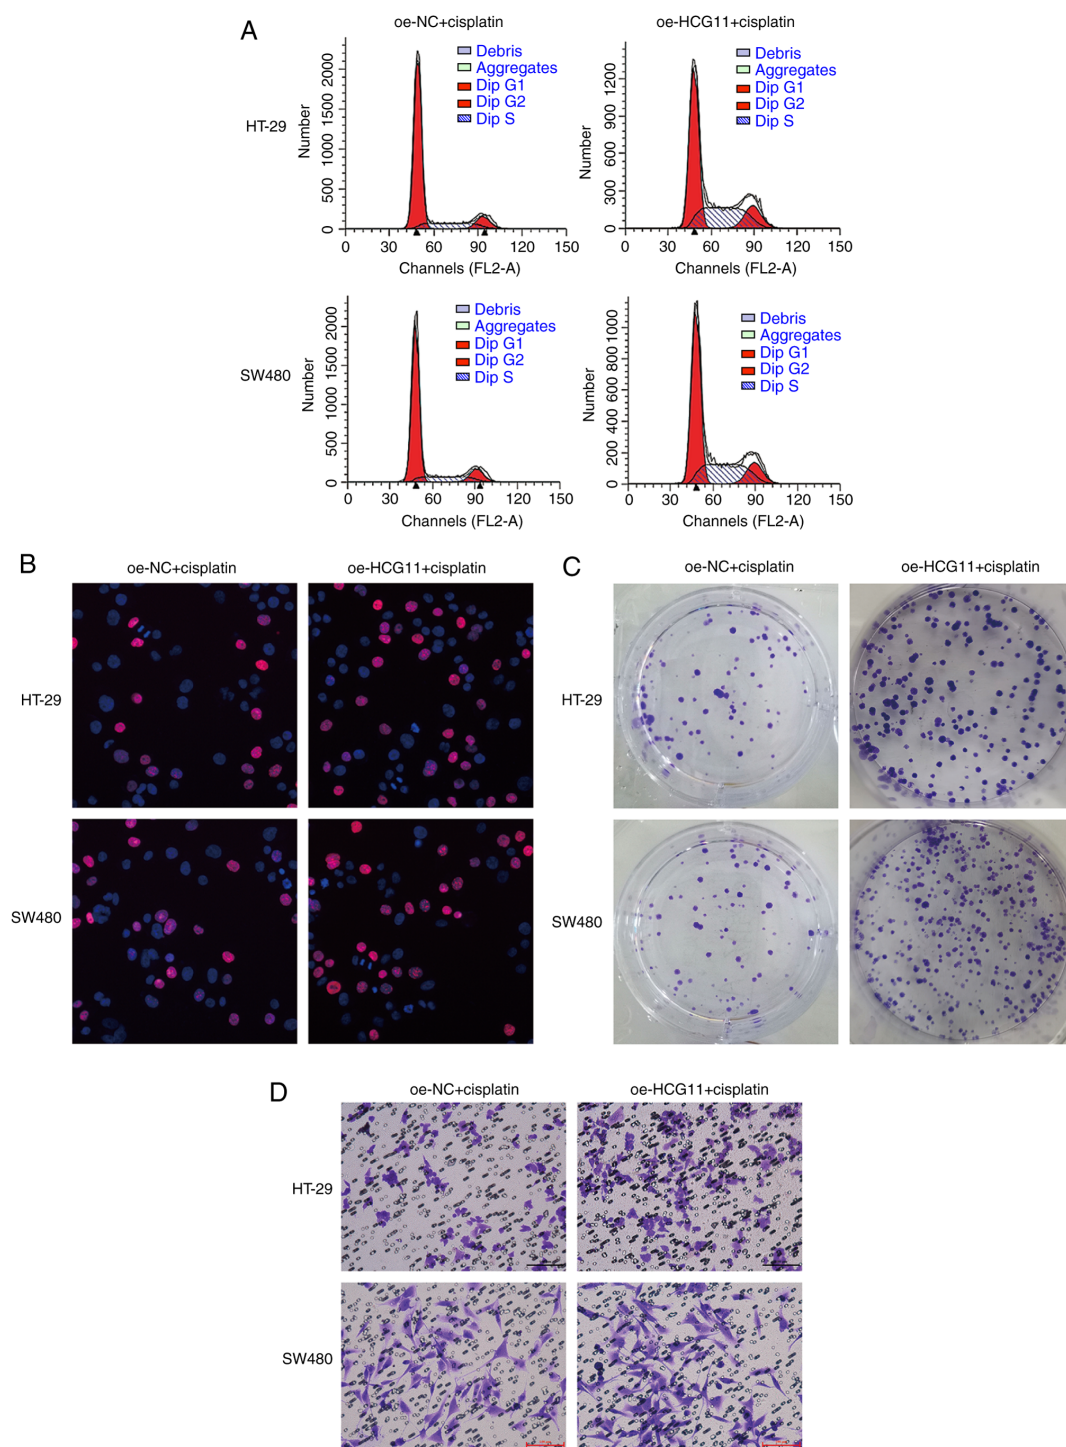

Supplement: Supplementary file 1 [file downloadSupplementary]
